# Supplementary material for: Captivation of state university: The impact of expressive writing therapy on students' academic stress and emotions
Source: Research Square preprint supplement (doi:10.21203/rs.3.rs-8677719/v1), 2026-02-09
Supplement: Supplementary file 1 [file d4977a977f1359eb7166599d.docx]

**Attachment**

**Descriptive Statistics eksperimen** **group**

| *Descriptive Statistics* | | | | | | |
| --- | --- | --- | --- | --- | --- | --- |
|  | Valid | Missing | Mean | Std. Deviation | Minimum | Maximum |
| Jenis Kelamin | 25 | 0 |  |  |  |  |
| Umur | 25 | 0 | 17.093 | 0.578 | 16.10 | 17.90 |
| Pendidikan terakhir ayah yang anda ketahui | 25 | 0 |  |  |  |  |
| Pendidikan terakhir ibu yang anda ketahui | 25 | 0 |  |  |  |  |
| Mengikuti bimbingan belajar (bimbel) di luar sekolah | 25 | 0 |  |  |  |  |
| Berapa jam bimbel dalam 1 hari | 23 | 2 | 4.050 | 1.251 | 3.000 | 7.000 |
| Berapa hari bimbel dalam 1 minggu | 19 | 6 |  |  | 2 | 7 |
|  | | | | | | |

**Frequency Tables**

| *Frequencies for Jenis Kelamin* | | | | |
| --- | --- | --- | --- | --- |
| Jenis Kelamin | Frequency | Percent | Valid Percent | Cumulative Percent |
| Laki-laki | 11 | 44.0 | 44.0 | 44.0 |
| Perempuan | 14 | 56.0 | 56.0 | 100.0 |
| Missing | 0 | 0.0 |  |  |
| Total | 25 | 100.0 |  |  |
|  | | | | |

| *Frequencies for Umur* | | | | |
| --- | --- | --- | --- | --- |
| Umur | Frequency | Percent | Valid Percent | Cumulative Percent |
| 16.1 | 2 | 8.0 | 8.0 | 8.0 |
| 16.11 | 3 | 12.0 | 12.0 | 20.0 |
| 16.8 | 1 | 4.0 | 4.0 | 24.0 |
| 17 | 3 | 12.0 | 12.0 | 36.0 |
| 17.1 | 2 | 8.0 | 8.0 | 44.0 |
| 17.2 | 4 | 16.0 | 16.0 | 60.0 |
| 17.3 | 1 | 4.0 | 4.0 | 64.0 |
| 17.4 | 3 | 12.0 | 12.0 | 76.0 |
| 17.6 | 2 | 8.0 | 8.0 | 84.0 |
| 17.8 | 3 | 12.0 | 12.0 | 96.0 |
| 17.9 | 1 | 4.0 | 4.0 | 100.0 |
| Missing | 0 | 0.0 |  |  |
| Total | 25 | 100.0 |  |  |
|  | | | | |

| *Frequencies for Mengikuti bimbingan belajar (bimbel) di luar sekolah* | | | | |
| --- | --- | --- | --- | --- |
| Mengikuti bimbingan belajar (bimbel) di luar sekolah | Frequency | Percent | Valid Percent | Cumulative Percent |
| TIDAK | 2 | 8.0 | 8.0 | 8.0 |
| YA | 23 | 92.0 | 92.0 | 100.0 |
| Missing | 0 | 0.0 |  |  |
| Total | 25 | 100.0 |  |  |
|  | | | | |

| *Frequencies for Berapa jam bimbel dalam 1 hari* | | | | |
| --- | --- | --- | --- | --- |
| Berapa jam bimbel dalam 1 hari | Frequency | Percent | Valid Percent | Cumulative Percent |
| 3 | 2 | 8.0 | 8.7 | 8.7 |
| 3.15 | 3 | 12.0 | 13.0 | 21.7 |
| 3.2 | 1 | 4.0 | 4.3 | 26.1 |
| 3.3 | 7 | 28.0 | 30.4 | 56.5 |
| 4 | 3 | 12.0 | 13.0 | 69.6 |
| 4.15 | 1 | 4.0 | 4.3 | 73.9 |
| 4.5 | 1 | 4.0 | 4.3 | 78.3 |
| 5.3 | 2 | 8.0 | 8.7 | 87.0 |
| 6.15 | 1 | 4.0 | 4.3 | 91.3 |
| 7 | 2 | 8.0 | 8.7 | 100.0 |
| Missing | 2 | 8.0 |  |  |
| Total | 25 | 100.0 |  |  |
|  | | | | |

| *Frequencies for Berapa hari bimbel dalam 1 minggu* | | | | |
| --- | --- | --- | --- | --- |
| Berapa hari bimbel dalam 1 minggu | Frequency | Percent | Valid Percent | Cumulative Percent |
| 2 | 4 | 16.0 | 21.1 | 21.1 |
| 3 | 9 | 36.0 | 47.4 | 68.4 |
| 5 | 3 | 12.0 | 15.8 | 84.2 |
| 6 | 2 | 8.0 | 10.5 | 94.7 |
| 7 | 1 | 4.0 | 5.3 | 100.0 |
| Missing | 6 | 24.0 |  |  |
| Total | 25 | 100.0 |  |  |
|  | | | | |

**Descriptive Statistics control group**

| *Descriptive Statistics* | | | | | | |
| --- | --- | --- | --- | --- | --- | --- |
|  | Valid | Missing | Mean | Std. Deviation | Minimum | Maximum |
| Jenis Kelamin | 25 | 0 |  |  |  |  |
| Umur | 25 | 0 | 17.121 | 0.548 | 16.00 | 17.70 |
| Pendidikan terakhir ayah yang anda ketahui | 25 | 0 |  |  |  |  |
| Pendidikan terakhir ibu yang anda ketahui | 25 | 0 |  |  |  |  |
| Mengikuti bimbingan belajar (bimbel) di luar sekolah | 25 | 0 |  |  |  |  |
| Berapa jam bimbel dalam 1 hari | 22 | 3 | 3.482 | 1.018 | 1.300 | 7.000 |
| Berapa hari bimbel dalam 1 minggu | 16 | 9 |  |  | 2 | 6 |
|  | | | | | | |

**Frequency Tables**

| *Frequencies for Jenis Kelamin* | | | | |
| --- | --- | --- | --- | --- |
| Jenis Kelamin | Frequency | Percent | Valid Percent | Cumulative Percent |
| Laki-laki | 9 | 36.0 | 36.0 | 36.0 |
| Perempuan | 16 | 64.0 | 64.0 | 100.0 |
| Missing | 0 | 0.0 |  |  |
| Total | 25 | 100.0 |  |  |
|  | | | | |

| *Frequencies for Umur* | | | | |
| --- | --- | --- | --- | --- |
| Umur | Frequency | Percent | Valid Percent | Cumulative Percent |
| 16 | 1 | 4.0 | 4.0 | 4.0 |
| 16.1 | 1 | 4.0 | 4.0 | 8.0 |
| 16.11 | 2 | 8.0 | 8.0 | 16.0 |
| 16.3 | 1 | 4.0 | 4.0 | 20.0 |
| 17 | 1 | 4.0 | 4.0 | 24.0 |
| 17.1 | 3 | 12.0 | 12.0 | 36.0 |
| 17.2 | 5 | 20.0 | 20.0 | 56.0 |
| 17.4 | 1 | 4.0 | 4.0 | 60.0 |
| 17.5 | 5 | 20.0 | 20.0 | 80.0 |
| 17.6 | 3 | 12.0 | 12.0 | 92.0 |
| 17.7 | 2 | 8.0 | 8.0 | 100.0 |
| Missing | 0 | 0.0 |  |  |
| Total | 25 | 100.0 |  |  |
|  | | | | |

| *Frequencies for Pendidikan terakhir ayah yang anda ketahui* | | | | |
| --- | --- | --- | --- | --- |
| Pendidikan terakhir ayah yang anda ketahui | Frequency | Percent | Valid Percent | Cumulative Percent |
| D3 | 3 | 12.0 | 12.0 | 12.0 |
| S1 | 11 | 44.0 | 44.0 | 56.0 |
| S2 | 4 | 16.0 | 16.0 | 72.0 |
| S3 | 2 | 8.0 | 8.0 | 80.0 |
| SMA sederajat | 5 | 20.0 | 20.0 | 100.0 |
| Missing | 0 | 0.0 |  |  |
| Total | 25 | 100.0 |  |  |
|  | | | | |

| *Frequencies for Pendidikan terakhir ibu yang anda ketahui* | | | | |
| --- | --- | --- | --- | --- |
| Pendidikan terakhir ibu yang anda ketahui | Frequency | Percent | Valid Percent | Cumulative Percent |
| D1 | 2 | 8.0 | 8.0 | 8.0 |
| D3 | 5 | 20.0 | 20.0 | 28.0 |
| S1 | 12 | 48.0 | 48.0 | 76.0 |
| S2 | 3 | 12.0 | 12.0 | 88.0 |
| SMA sederajat | 3 | 12.0 | 12.0 | 100.0 |
| Missing | 0 | 0.0 |  |  |
| Total | 25 | 100.0 |  |  |
|  | | | | |

| *Frequencies for Mengikuti bimbingan belajar (bimbel) di luar sekolah* | | | | |
| --- | --- | --- | --- | --- |
| Mengikuti bimbingan belajar (bimbel) di luar sekolah | Frequency | Percent | Valid Percent | Cumulative Percent |
| TIDAK | 3 | 12.0 | 12.0 | 12.0 |
| YA | 22 | 88.0 | 88.0 | 100.0 |
| Missing | 0 | 0.0 |  |  |
| Total | 25 | 100.0 |  |  |
|  | | | | |

| *Frequencies for Berapa jam bimbel dalam 1 hari* | | | | |
| --- | --- | --- | --- | --- |
| Berapa jam bimbel dalam 1 hari | Frequency | Percent | Valid Percent | Cumulative Percent |
| 1.3 | 1 | 4.0 | 4.5 | 4.5 |
| 2.3 | 1 | 4.0 | 4.5 | 9.1 |
| 3 | 2 | 8.0 | 9.1 | 18.2 |
| 3.15 | 4 | 16.0 | 18.2 | 36.4 |
| 3.2 | 2 | 8.0 | 9.1 | 45.5 |
| 3.3 | 4 | 16.0 | 18.2 | 63.6 |
| 3.5 | 1 | 4.0 | 4.5 | 68.2 |
| 4 | 5 | 20.0 | 22.7 | 90.9 |
| 4.3 | 1 | 4.0 | 4.5 | 95.5 |
| 7 | 1 | 4.0 | 4.5 | 100.0 |
| Missing | 3 | 12.0 |  |  |
| Total | 25 | 100.0 |  |  |
|  | | | | |

| *Frequencies for Berapa hari bimbel dalam 1 minggu* | | | | |
| --- | --- | --- | --- | --- |
| Berapa hari bimbel dalam 1 minggu | Frequency | Percent | Valid Percent | Cumulative Percent |
| 2 | 3 | 12.0 | 18.8 | 18.8 |
| 3 | 9 | 36.0 | 56.3 | 75.0 |
| 4 | 1 | 4.0 | 6.3 | 81.3 |
| 5 | 1 | 4.0 | 6.3 | 87.5 |
| 6 | 2 | 8.0 | 12.5 | 100.0 |
| Missing | 9 | 36.0 |  |  |
| Total | 25 | 100.0 |  |  |
|  | | | | |

**Paired Samples T-Test eksperiment group all participant**

| *Paired Samples T-Test* | | | | | | | | | | | | | | | | | | | |
| --- | --- | --- | --- | --- | --- | --- | --- | --- | --- | --- | --- | --- | --- | --- | --- | --- | --- | --- | --- |
|  | | | | | | | | | | | | | | | | 95% CI for Cohen's d | | | |
| Measure 1 | |  | | Measure 2 | | t | | df | | p | | Cohen's d | | SE Cohen's d | | Lower | | Upper | |
| Pre afeksi positif |  | - |  | Post afeksi positif |  | -2.863 |  | 24 |  | .009 |  | -0.573 |  | 0.220 |  | -0.991 |  | -0.144 |  |
| Pre afeksi negatif |  | - |  | Post afeksi negatif |  | 2.598 |  | 24 |  | .016 |  | 0.520 |  | 0.187 |  | 0.097 |  | 0.933 |  |
| Pre keseimbangan afeksi |  | - |  | Post keseimbangan afeksi |  | -3.251 |  | 24 |  | .003 |  | -0.650 |  | 0.231 |  | -1.077 |  | -0.212 |  |
| Pre self-expectation |  | - |  | Post self-expectation |  | 1.413 |  | 24 |  | .170 |  | 0.283 |  | 0.225 |  | -0.120 |  | 0.680 |  |
| Pre workload |  | - |  | Post workload |  | -0.693 |  | 24 |  | .495 |  | -0.139 |  | 0.159 |  | -0.531 |  | 0.257 |  |
| Pre despondency |  | - |  | Post despondency |  | 0.080 |  | 24 |  | .937 |  | 0.016 |  | 0.194 |  | -0.376 |  | 0.408 |  |
| Pre pressure from study |  | - |  | Post pressure from study |  | -1.464 |  | 24 |  | .156 |  | -0.293 |  | 0.140 |  | -0.690 |  | 0.111 |  |
| Pre worry about grades |  | - |  | Post worry about grades |  | -0.261 |  | 24 |  | .796 |  | -0.052 |  | 0.199 |  | -0.444 |  | 0.341 |  |
|  | | | | | | | | | | | | | | | | | | | |
| *Note.*  Student's t-test. | | | | | | | | | | | | | | | | | | | |

**Assumption Checks**

| *Test of Normality (Shapiro-Wilk)* | | | | | | | | | |
| --- | --- | --- | --- | --- | --- | --- | --- | --- | --- |
|  | |  | |  | | W | | p | |
| Pre afeksi positif |  | - |  | Post afeksi positif |  | 0.941 |  | .153 |  |
| Pre afeksi negatif |  | - |  | Post afeksi negatif |  | 0.974 |  | .748 |  |
| Pre keseimbangan afeksi |  | - |  | Post keseimbangan afeksi |  | 0.968 |  | .594 |  |
| Pre self-expectation |  | - |  | Post self-expectation |  | 0.961 |  | .429 |  |
| Pre workload |  | - |  | Post workload |  | 0.923 |  | .059 |  |
| Pre despondency |  | - |  | Post despondency |  | 0.963 |  | .472 |  |
| Pre pressure from study |  | - |  | Post pressure from study |  | 0.932 |  | .097 |  |
| Pre worry about grades |  | - |  | Post worry about grades |  | 0.909 |  | .029 |  |
|  | | | | | | | | | |
| *Note.*  Significant results suggest a deviation from normality. | | | | | | | | | |

**Descriptives**

| *Descriptives* | | | | | | | | | | | |
| --- | --- | --- | --- | --- | --- | --- | --- | --- | --- | --- | --- |
|  | | N | | Mean | | SD | | SE | | Coefficient of variation | |
| Pre afeksi positif |  | 25 |  | 29.200 |  | 6.886 |  | 1.377 |  | 0.236 |  |
| Post afeksi positif |  | 25 |  | 33.560 |  | 7.969 |  | 1.594 |  | 0.237 |  |
| Pre afeksi negatif |  | 25 |  | 32.160 |  | 8.153 |  | 1.631 |  | 0.254 |  |
| Post afeksi negatif |  | 25 |  | 28.400 |  | 8.292 |  | 1.658 |  | 0.292 |  |
| Pre keseimbangan afeksi |  | 25 |  | -2.960 |  | 10.757 |  | 2.151 |  | -3.634 |  |
| Post keseimbangan afeksi |  | 25 |  | 5.160 |  | 12.815 |  | 2.563 |  | 2.484 |  |
| Pre self-expectation |  | 25 |  | 11.760 |  | 2.934 |  | 0.587 |  | 0.249 |  |
| Post self-expectation |  | 25 |  | 10.880 |  | 2.698 |  | 0.540 |  | 0.248 |  |
| Pre workload |  | 25 |  | 10.320 |  | 3.520 |  | 0.704 |  | 0.341 |  |
| Post workload |  | 25 |  | 10.680 |  | 2.897 |  | 0.579 |  | 0.271 |  |
| Pre despondency |  | 25 |  | 10.960 |  | 2.761 |  | 0.552 |  | 0.252 |  |
| Post despondency |  | 25 |  | 10.920 |  | 2.344 |  | 0.469 |  | 0.215 |  |
| Pre pressure from study |  | 25 |  | 13.760 |  | 3.597 |  | 0.719 |  | 0.261 |  |
| Post pressure from study |  | 25 |  | 14.440 |  | 2.973 |  | 0.595 |  | 0.206 |  |
| Pre worry about grades |  | 25 |  | 10.800 |  | 2.291 |  | 0.458 |  | 0.212 |  |
| Post worry about grades |  | 25 |  | 10.920 |  | 2.326 |  | 0.465 |  | 0.213 |  |
|  | | | | | | | | | | | |

**Paired Samples T-Test eksperimen group male**

| *Paired Samples T-Test* | | | | | | | |
| --- | --- | --- | --- | --- | --- | --- | --- |
| Measure 1 |  | Measure 2 | t | df | p | Cohen's d | SE Cohen's d |
| Pre afeksi positif | - | Post afeksi positif | -2.417 | 10 | .036 | -0.729 | 0.234 |
| Pre afeksi negatif | - | Post afeksi negatif | 2.666 | 10 | .024 | 0.804 | 0.248 |
| Pre keseimbangan afeksi | - | Post keseimbangan afeksi | -3.259 | 10 | .009 | -0.983 | 0.345 |
| Pre self-expectation | - | Post self-expectation | 1.070 | 10 | .310 | 0.323 | 0.382 |
| Pre workload | - | Post workload | 0.382 | 10 | .711 | 0.115 | 0.253 |
| Pre despondency | - | Post despondency | 0.888 | 10 | .396 | 0.268 | 0.309 |
| Pre pressure from study | - | Post pressure from study | -1.077 | 10 | .307 | -0.325 | 0.235 |
| Pre worry about grades | - | Post worry about grades | -0.134 | 10 | .896 | -0.040 | 0.320 |
|  | | | | | | | |
| *Note.*  Student's t-test. | | | | | | | |

**Assumption Checks**

| *Test of Normality (Shapiro-Wilk)* | | | | |
| --- | --- | --- | --- | --- |
|  |  |  | W | p |
| Pre afeksi positif | - | Post afeksi positif | 0.925 | .361 |
| Pre afeksi negatif | - | Post afeksi negatif | 0.947 | .604 |
| Pre keseimbangan afeksi | - | Post keseimbangan afeksi | 0.991 | .998 |
| Pre self-expectation | - | Post self-expectation | 0.929 | .404 |
| Pre workload | - | Post workload | 0.943 | .553 |
| Pre despondency | - | Post despondency | 0.841 | .033 |
| Pre pressure from study | - | Post pressure from study | 0.899 | .180 |
| Pre worry about grades | - | Post worry about grades | 0.876 | .093 |
|  | | | | |
| *Note.*  Significant results suggest a deviation from normality. | | | | |

**Descriptives**

| *Descriptives* | | | | | |
| --- | --- | --- | --- | --- | --- |
|  | N | Mean | SD | SE | Coefficient of variation |
| Pre afeksi positif | 11 | 31.091 | 4.867 | 1.468 | 0.157 |
| Post afeksi positif | 11 | 34.545 | 7.244 | 2.184 | 0.210 |
| Pre afeksi negatif | 11 | 31.818 | 8.987 | 2.710 | 0.282 |
| Post afeksi negatif | 11 | 26.909 | 7.778 | 2.345 | 0.289 |
| Pre keseimbangan afeksi | 11 | -0.727 | 6.930 | 2.089 | -9.528 |
| Post keseimbangan afeksi | 11 | 7.636 | 10.142 | 3.058 | 1.328 |
| Pre self-expectation | 11 | 11.636 | 2.292 | 0.691 | 0.197 |
| Post self-expectation | 11 | 10.636 | 2.693 | 0.812 | 0.253 |
| Pre workload | 11 | 11.636 | 2.803 | 0.845 | 0.241 |
| Post workload | 11 | 11.364 | 2.873 | 0.866 | 0.253 |
| Pre despondency | 11 | 12.000 | 2.049 | 0.618 | 0.171 |
| Post despondency | 11 | 11.364 | 2.580 | 0.778 | 0.227 |
| Pre pressure from study | 11 | 14.455 | 3.045 | 0.918 | 0.211 |
| Post pressure from study | 11 | 15.182 | 2.822 | 0.851 | 0.186 |
| Pre worry about grades | 11 | 10.818 | 1.471 | 0.444 | 0.136 |
| Post worry about grades | 11 | 10.909 | 2.468 | 0.744 | 0.226 |
|  | | | | | |

**Paired Samples T-Test eksperimen group female**

| *Paired Samples T-Test* | | | | | | | |
| --- | --- | --- | --- | --- | --- | --- | --- |
| Measure 1 |  | Measure 2 | t | df | p | Cohen's d | SE Cohen's d |
| Pre afeksi positif | - | Post afeksi positif | -2.017 | 13 | .065 | -0.539 | 0.322 |
| Pre afeksi negatif | - | Post afeksi negatif | 1.316 | 13 | .211 | 0.352 | 0.269 |
| Pre keseimbangan afeksi | - | Post keseimbangan afeksi | -1.947 | 13 | .073 | -0.520 | 0.312 |
| Pre self-expectation | - | Post self-expectation | 0.908 | 13 | .381 | 0.243 | 0.278 |
| Pre workload | - | Post workload | -1.170 | 13 | .263 | -0.313 | 0.215 |
| Pre despondency | - | Post despondency | -0.618 | 13 | .547 | -0.165 | 0.256 |
| Pre pressure from study | - | Post pressure from study | -0.974 | 13 | .348 | -0.260 | 0.177 |
| Pre worry about grades | - | Post worry about grades | -0.221 | 13 | .828 | -0.059 | 0.247 |
|  | | | | | | | |
| *Note.*  Student's t-test. | | | | | | | |

**Assumption Checks**

| *Test of Normality (Shapiro-Wilk)* | | | | |
| --- | --- | --- | --- | --- |
|  |  |  | W | p |
| Pre afeksi positif | - | Post afeksi positif | 0.917 | .200 |
| Pre afeksi negatif | - | Post afeksi negatif | 0.977 | .955 |
| Pre keseimbangan afeksi | - | Post keseimbangan afeksi | 0.922 | .236 |
| Pre self-expectation | - | Post self-expectation | 0.873 | .046 |
| Pre workload | - | Post workload | 0.816 | .008 |
| Pre despondency | - | Post despondency | 0.930 | .302 |
| Pre pressure from study | - | Post pressure from study | 0.952 | .591 |
| Pre worry about grades | - | Post worry about grades | 0.798 | .005 |
|  | | | | |
| *Note.*  Significant results suggest a deviation from normality. | | | | |

**Descriptives**

| *Descriptives* | | | | | |
| --- | --- | --- | --- | --- | --- |
|  | N | Mean | SD | SE | Coefficient of variation |
| Pre afeksi positif | 14 | 27.714 | 7.995 | 2.137 | 0.288 |
| Post afeksi positif | 14 | 32.786 | 8.684 | 2.321 | 0.265 |
| Pre afeksi negatif | 14 | 32.429 | 7.773 | 2.077 | 0.240 |
| Post afeksi negatif | 14 | 29.571 | 8.777 | 2.346 | 0.297 |
| Pre keseimbangan afeksi | 14 | -4.714 | 13.005 | 3.476 | -2.759 |
| Post keseimbangan afeksi | 14 | 3.214 | 14.656 | 3.917 | 4.560 |
| Pre self-expectation | 14 | 11.857 | 3.439 | 0.919 | 0.290 |
| Post self-expectation | 14 | 11.071 | 2.786 | 0.745 | 0.252 |
| Pre workload | 14 | 9.286 | 3.771 | 1.008 | 0.406 |
| Post workload | 14 | 10.143 | 2.905 | 0.776 | 0.286 |
| Pre despondency | 14 | 10.143 | 3.035 | 0.811 | 0.299 |
| Post despondency | 14 | 10.571 | 2.174 | 0.581 | 0.206 |
| Pre pressure from study | 14 | 13.214 | 4.003 | 1.070 | 0.303 |
| Post pressure from study | 14 | 13.857 | 3.060 | 0.818 | 0.221 |
| Pre worry about grades | 14 | 10.786 | 2.833 | 0.757 | 0.263 |
| Post worry about grades | 14 | 10.929 | 2.303 | 0.615 | 0.211 |
|  | | | | | |

**Paired Samples T-Test control group all participant**

| *Paired Samples T-Test* | | | | | | | | | | | | | | | |
| --- | --- | --- | --- | --- | --- | --- | --- | --- | --- | --- | --- | --- | --- | --- | --- |
| Measure 1 | |  | | Measure 2 | | t | | df | | p | | Cohen's d | | SE Cohen's d | |
| Pre afeksi positif |  | - |  | Post afeksi positif |  | -0.221 |  | 24 |  | .827 |  | -0.044 |  | 0.172 |  |
| Pre afeksi negatif |  | - |  | Post afeksi negatif |  | -2.562 |  | 24 |  | .017 |  | -0.512 |  | 0.171 |  |
| Pre keseimbangan afeksi |  | - |  | Post keseimbangan afeksi |  | 1.968 |  | 24 |  | .061 |  | 0.394 |  | 0.188 |  |
| Pre self-expectation |  | - |  | Post self-expectation |  | -1.270 |  | 24 |  | .216 |  | -0.254 |  | 0.135 |  |
| Pre workload |  | - |  | Post workload |  | 1.986 |  | 24 |  | .059 |  | 0.397 |  | 0.174 |  |
| Pre despondency |  | - |  | Post despondency |  | -2.585 |  | 24 |  | .016 |  | -0.517 |  | 0.123 |  |
| Pre pressure from study |  | - |  | Post pressure from study |  | -0.062 |  | 24 |  | .951 |  | -0.012 |  | 0.200 |  |
| Pre worry about grades |  | - |  | Post worry about grades |  | -0.485 |  | 24 |  | .632 |  | -0.097 |  | 0.107 |  |
|  | | | | | | | | | | | | | | | |
| *Note.*  Student's t-test. | | | | | | | | | | | | | | | |

**Assumption Checks**

| *Test of Normality (Shapiro-Wilk)* | | | | | | | | | |
| --- | --- | --- | --- | --- | --- | --- | --- | --- | --- |
|  | |  | |  | | W | | p | |
| Pre afeksi positif |  | - |  | Post afeksi positif |  | 0.941 |  | .153 |  |
| Pre afeksi negatif |  | - |  | Post afeksi negatif |  | 0.958 |  | .385 |  |
| Pre keseimbangan afeksi |  | - |  | Post keseimbangan afeksi |  | 0.970 |  | .657 |  |
| Pre self-expectation |  | - |  | Post self-expectation |  | 0.935 |  | .111 |  |
| Pre workload |  | - |  | Post workload |  | 0.935 |  | .115 |  |
| Pre despondency |  | - |  | Post despondency |  | 0.917 |  | .043 |  |
| Pre pressure from study |  | - |  | Post pressure from study |  | 0.920 |  | .052 |  |
| Pre worry about grades |  | - |  | Post worry about grades |  | 0.930 |  | .087 |  |
|  | | | | | | | | | |
| *Note.*  Significant results suggest a deviation from normality. | | | | | | | | | |

**Descriptives**

| *Descriptives* | | | | | | | | | | | |
| --- | --- | --- | --- | --- | --- | --- | --- | --- | --- | --- | --- |
|  | | N | | Mean | | SD | | SE | | Coefficient of variation | |
| Pre afeksi positif |  | 25 |  | 32.800 |  | 8.026 |  | 1.605 |  | 0.245 |  |
| Post afeksi positif |  | 25 |  | 33.080 |  | 6.198 |  | 1.240 |  | 0.187 |  |
| Pre afeksi negatif |  | 25 |  | 27.240 |  | 11.084 |  | 2.217 |  | 0.407 |  |
| Post afeksi negatif |  | 25 |  | 31.600 |  | 9.979 |  | 1.996 |  | 0.316 |  |
| Pre keseimbangan afeksi |  | 25 |  | 5.560 |  | 12.380 |  | 2.476 |  | 2.227 |  |
| Post keseimbangan afeksi |  | 25 |  | 1.480 |  | 10.013 |  | 2.003 |  | 6.766 |  |
| Pre self-expectation |  | 25 |  | 10.640 |  | 3.763 |  | 0.753 |  | 0.354 |  |
| Post self-expectation |  | 25 |  | 11.240 |  | 3.086 |  | 0.617 |  | 0.275 |  |
| Pre workload |  | 25 |  | 10.000 |  | 2.398 |  | 0.480 |  | 0.240 |  |
| Post workload |  | 25 |  | 9.160 |  | 2.625 |  | 0.525 |  | 0.287 |  |
| Pre despondency |  | 25 |  | 9.040 |  | 2.850 |  | 0.570 |  | 0.315 |  |
| Post despondency |  | 25 |  | 9.880 |  | 2.759 |  | 0.552 |  | 0.279 |  |
| Pre pressure from study |  | 25 |  | 12.040 |  | 3.075 |  | 0.615 |  | 0.255 |  |
| Post pressure from study |  | 25 |  | 12.080 |  | 3.353 |  | 0.671 |  | 0.278 |  |
| Pre worry about grades |  | 25 |  | 10.600 |  | 3.000 |  | 0.600 |  | 0.283 |  |
| Post worry about grades |  | 25 |  | 10.760 |  | 3.166 |  | 0.633 |  | 0.294 |  |
|  | | | | | | | | | | | |

**Paired Samples T-Test control group female**

| *Paired Samples T-Test* | | | | | | | |
| --- | --- | --- | --- | --- | --- | --- | --- |
| Measure 1 |  | Measure 2 | t | df | p | Cohen's d | SE Cohen's d |
| Pre afeksi positif | - | Post afeksi positif | 1.017 | 15 | .325 | 0.254 | 0.195 |
| Pre afeksi negatif | - | Post afeksi negatif | -1.050 | 15 | .311 | -0.262 | 0.193 |
| Pre keseimbangan afeksi | - | Post keseimbangan afeksi | 1.228 | 15 | .238 | 0.307 | 0.223 |
| Pre self-expectation | - | Post self-expectation | -1.210 | 15 | .245 | -0.303 | 0.162 |
| Pre workload | - | Post workload | 3.027 | 15 | .008 | 0.757 | 0.266 |
| Pre despondency | - | Post despondency | -1.414 | 15 | .178 | -0.354 | 0.133 |
| Pre pressure from study | - | Post pressure from study | 0.324 | 15 | .751 | 0.081 | 0.243 |
| Pre worry about grades | - | Post worry about grades | -0.837 | 15 | .416 | -0.209 | 0.126 |
|  | | | | | | | |
| *Note.*  Student's t-test. | | | | | | | |

**Assumption Checks**

| *Test of Normality (Shapiro-Wilk)* | | | | |
| --- | --- | --- | --- | --- |
|  |  |  | W | p |
| Pre afeksi positif | - | Post afeksi positif | 0.922 | .182 |
| Pre afeksi negatif | - | Post afeksi negatif | 0.962 | .703 |
| Pre keseimbangan afeksi | - | Post keseimbangan afeksi | 0.958 | .626 |
| Pre self-expectation | - | Post self-expectation | 0.928 | .227 |
| Pre workload | - | Post workload | 0.903 | .091 |
| Pre despondency | - | Post despondency | 0.937 | .314 |
| Pre pressure from study | - | Post pressure from study | 0.941 | .363 |
| Pre worry about grades | - | Post worry about grades | 0.900 | .079 |
|  | | | | |
| *Note.*  Significant results suggest a deviation from normality. | | | | |

**Descriptives**

| *Descriptives* | | | | | |
| --- | --- | --- | --- | --- | --- |
|  | N | Mean | SD | SE | Coefficient of variation |
| Pre afeksi positif | 16 | 33.875 | 6.820 | 1.705 | 0.201 |
| Post afeksi positif | 16 | 32.563 | 6.603 | 1.651 | 0.203 |
| Pre afeksi negatif | 16 | 30.063 | 11.251 | 2.813 | 0.374 |
| Post afeksi negatif | 16 | 32.188 | 9.738 | 2.435 | 0.303 |
| Pre keseimbangan afeksi | 16 | 3.813 | 14.270 | 3.567 | 3.743 |
| Post keseimbangan afeksi | 16 | 0.375 | 8.876 | 2.219 | 23.669 |
| Pre self-expectation | 16 | 11.125 | 3.775 | 0.944 | 0.339 |
| Post self-expectation | 16 | 11.813 | 3.038 | 0.759 | 0.257 |
| Pre workload | 16 | 10.313 | 1.991 | 0.498 | 0.193 |
| Post workload | 16 | 8.750 | 2.352 | 0.588 | 0.269 |
| Pre despondency | 16 | 9.000 | 2.757 | 0.689 | 0.306 |
| Post despondency | 16 | 9.500 | 2.708 | 0.677 | 0.285 |
| Pre pressure from study | 16 | 12.563 | 2.966 | 0.741 | 0.236 |
| Post pressure from study | 16 | 12.313 | 3.361 | 0.840 | 0.273 |
| Pre worry about grades | 16 | 10.813 | 2.810 | 0.702 | 0.260 |
| Post worry about grades | 16 | 11.125 | 3.074 | 0.769 | 0.276 |
|  | | | | | |

**Paired Samples T-Test control group male**

| *Paired Samples T-Test* | | | | | | | |
| --- | --- | --- | --- | --- | --- | --- | --- |
| Measure 1 |  | Measure 2 | t | df | p | Cohen's d | SE Cohen's d |
| Pre afeksi positif | - | Post afeksi positif | -1.243 | 8 | .249 | -0.414 | 0.284 |
| Pre afeksi negatif | - | Post afeksi negatif | -3.066 | 8 | .015 | -1.022 | 0.326 |
| Pre keseimbangan afeksi | - | Post keseimbangan afeksi | 1.700 | 8 | .128 | 0.567 | 0.301 |
| Pre self-expectation | - | Post self-expectation | -0.503 | 8 | .629 | -0.168 | 0.250 |
| Pre workload | - | Post workload | -0.839 | 8 | .426 | -0.280 | 0.177 |
| Pre despondency | - | Post despondency | -2.307 | 8 | .050 | -0.769 | 0.233 |
| Pre pressure from study | - | Post pressure from study | -0.466 | 8 | .653 | -0.155 | 0.356 |
| Pre worry about grades | - | Post worry about grades | 0.170 | 8 | .870 | 0.057 | 0.191 |
|  | | | | | | | |
| *Note.*  Student's t-test. | | | | | | | |

**Assumption Checks**

| *Test of Normality (Shapiro-Wilk)* | | | | |
| --- | --- | --- | --- | --- |
|  |  |  | W | p |
| Pre afeksi positif | - | Post afeksi positif | 0.949 | .678 |
| Pre afeksi negatif | - | Post afeksi negatif | 0.929 | .475 |
| Pre keseimbangan afeksi | - | Post keseimbangan afeksi | 0.962 | .819 |
| Pre self-expectation | - | Post self-expectation | 0.852 | .078 |
| Pre workload | - | Post workload | 0.851 | .077 |
| Pre despondency | - | Post despondency | 0.783 | .013 |
| Pre pressure from study | - | Post pressure from study | 0.808 | .025 |
| Pre worry about grades | - | Post worry about grades | 0.907 | .292 |
|  | | | | |
| *Note.*  Significant results suggest a deviation from normality. | | | | |

**Descriptives**

| *Descriptives* | | | | | |
| --- | --- | --- | --- | --- | --- |
|  | N | Mean | SD | SE | Coefficient of variation |
| Pre afeksi positif | 9 | 30.889 | 9.981 | 3.327 | 0.323 |
| Post afeksi positif | 9 | 34.000 | 5.657 | 1.886 | 0.166 |
| Pre afeksi negatif | 9 | 22.222 | 9.324 | 3.108 | 0.420 |
| Post afeksi negatif | 9 | 30.556 | 10.910 | 3.637 | 0.357 |
| Pre keseimbangan afeksi | 9 | 8.667 | 7.810 | 2.603 | 0.901 |
| Post keseimbangan afeksi | 9 | 3.444 | 12.095 | 4.032 | 3.511 |
| Pre self-expectation | 9 | 9.778 | 3.801 | 1.267 | 0.389 |
| Post self-expectation | 9 | 10.222 | 3.073 | 1.024 | 0.301 |
| Pre workload | 9 | 9.444 | 3.046 | 1.015 | 0.323 |
| Post workload | 9 | 9.889 | 3.060 | 1.020 | 0.309 |
| Pre despondency | 9 | 9.111 | 3.180 | 1.060 | 0.349 |
| Post despondency | 9 | 10.556 | 2.877 | 0.959 | 0.273 |
| Pre pressure from study | 9 | 11.111 | 3.219 | 1.073 | 0.290 |
| Post pressure from study | 9 | 11.667 | 3.500 | 1.167 | 0.300 |
| Pre worry about grades | 9 | 10.222 | 3.456 | 1.152 | 0.338 |
| Post worry about grades | 9 | 10.111 | 3.408 | 1.136 | 0.337 |
|  | | | | | |
